# Supplementary material for: Effects of coconut water on blood sugar and retina of rats with diabetes
Source: PeerJ. 2021 Jan 29;9:e10667. doi: 10.7717/peerj.10667 (PMC7849505; doi:10.7717/peerj.10667)
Supplement: Supplemental Information 2 [file peerj-09-10667-s002.xlsx]

## Sheet: Fasting blood sugar
Group I NC	0w	4.9	4.2	4.1	4.1	4.1	4.6	4.1	4.8	4.1	4.1	4.1
	4w	4.1	4.3	3.9	4	4.2	3.7	4.4	4.4	4.3	4.1	3.9
	8w	3.9	4	3.9	4.3	4	3.7	3.8	5	3.9	4.4	3.8
	12w	4.6	5.4	4.7	4.8	4.4	4.6	5.2	5.4	5.4	4.9	4.7
	16w	4.5	4.3	4.4	4.5	4.3	4.3	4.4	4.3	4.4	4.5	4.2
	20w	4.4	4.2	4.4	4	5	5.4	4	4.5	4.7	4.5	4.7
Group II DM	0w	22.2	21.1	22.7	22.2	22.2	22.3	21.4	21.6	22.6	22.8	22.4
	4w	24.3	24.6	25.7	24.5	24.6	25.7	25.2	24.1	26.2	25.3	24.3
	8w	28.3	33.2	33.3	25.6	30.6	25	30.3	26.3	25.1	31.9	26.4
	12w	31.1	32.8	33	25.1	33.3	33.2	25.1	25.3	32.6	32.6	33.3
	16w	33.2	32.6	32.1	33.3	32.9	33	25.2	25.3	25.2	31.6	31.6
	20w	27.2	33.2	32.3	27.7	32.6	33.2	27.1	33.3	33	32.7	33.2
Group III DM+CW	0w	22.2	21.9	22.3	22.6	21.7	21	21.6	22.2	21.6	21.1	21.6
	4w	25.8	21.2	25.4	25.9	25.5	25.8	25.9	24.4	25.5	25.8	25.7
	8w	23.3	21.1	21.1	23	23.7	23.4	21.1	23.4	23.8	21	23.2
	12w	21.2	24	24	23.8	23.9	23.8	24	23.9	21.3	23.8	21
	16w	23.9	23.5	23.5	23.7	23.6	26.9	26.9	23.3	27	27	26.8
	20w	23.3	23.2	23.3	23.2	24.4	25	23.5	23.4	25.3	26.2	23.3
Group IV DM+Gli	0w	21.7	23.2	24	21.1	22.9	21.2	21.4	21.7	22	21.6	23.7
	4w	24.4	25.4	24.1	25.3	24	24.1	24.1	24.3	25.3	24.1	24
	8w	24.3	18.3	18.3	23.4	18.1	23.6	21.8	24.6	20.4	24.5	18.4
	12w	18.4	18.4	23.7	20.8	20.9	19.1	23.9	20.1	23.3	18.4	22.6
	16w	25.4	20.2	24.7	20.2	20.4	25	24	24.2	25.2	24.3	20.2
	20w	24.8	25.9	23.2	23.2	23.8	25	26.3	23.3	24.7	23.4	23.2

## Sheet: body weight
Group I NC	0w	331.6	355.6	325.4	327.8	321.3	329.3	329.2	378.3	379.4	329.2	328.4
	4w	379.2	378.7	325.2	339.2	321	326.5	370	364.1	382.6	325.3	322.4
	8w	394.3	348.7	346.3	395.7	359	351	380.2	346.3	353.9	388.6	345.4
	12w	412.8	404.4	412.2	398.4	436.8	440.2	402.4	416.9	424.2	417.9	424.3
	16w	472.4	463.2	486.8	471.1	471	456.4	445.2	440.5	486.1	491.9	478.2
	20w	466.9	469	525.6	468.9	467.7	467.2	472.9	468	539.6	523.7	467.9
Group II DM	0w	337.9	378.7	321.3	321.7	379.4	327	375	338.8	326.2	324	325.9
	4w	261.2	261.4	263.3	276	280.3	261.2	270.5	260.9	259	260.2	260.3
	8w	257.1	255.3	273.3	275	263.1	257.3	270.4	256.4	255.3	258.3	259.6
	12w	256.3	284.7	256.6	257.6	256.3	258.4	258.3	259	256.8	270.4	256
	16w	245.3	246.5	246.4	246.3	247.1	246.3	248.2	246.2	248.3	246.3	245.4
	20w	245.7	246.4	245.6	290.3	247.6	246.2	293.2	246.3	248.3	245.7	249.7
Group III DM+CW	0w	379.8	335.7	379.6	379.6	378.3	378.4	379.3	376.5	378.5	375.2	376.9
	4w	282	284.3	277.2	283.7	275.7	283.9	284.2	284.5	284.7	281.7	285
	8w	259.8	266.3	262.7	264.1	267.8	273.7	272.9	264.4	260.4	274.4	272.4
	12w	241.4	243.1	241.4	246.6	240.3	268.9	243.2	269.7	245.4	268.9	267.3
	16w	244.5	262.1	269.4	241.3	248.3	265.4	240.8	267.4	241	251.4	233.8
	20w	285	288.9	289.7	289.7	260.8	240.4	241.1	289.4	289	260.4	246.4
Group IV DM+Gli	0w	354.2	351.9	350.2	353.6	348.4	354	353.2	355	352.7	354.9	353.8
	4w	266.3	311.9	310.6	269.1	266.4	270.4	311.3	268.1	310.7	265.3	310.5
	8w	298.2	261.2	299.3	260.1	261.2	270.3	261.4	295.3	262.3	299	294.5
	12w	259.4	257.3	283.7	256.4	257.4	276.9	289.4	282.4	271.4	256.7	278.9
	16w	257.9	259.4	256.4	255.3	260.1	280.4	277	262.3	263.1	272.6	251.2
	20w	250.4	270.4	255.4	253.7	253.2	253.4	281.4	257.9	252.5	251.3	262.2

## Sheet: OCT
Group I NC	8w	12w	Group II DM	8w	12w	Group III DM+CW	8w	12w	Group IV DM+Gli	8w	12w
	217	209		227	230		204	212		215	212
	214	217		248	245		197	198		209	191
	212	214		215	220		204	208		219	216
	209	207		245	243		212	212		212	225
	217	217		230	238		214	214		215	217
	214	206		243	245		209	225		214	217
	207	214		220	230		204	209		202	207
	217	212		238			212	201		204
	217	209		227			204			209
	214	207		248			204			208
	212	217		215			232			202
	213.63±3.41	211.72±4.31		232.36±12.70	235.85±9.51		208.73±9.17	209.88±8.27		209.91±5.66	209.57±9.27
